# Supplementary material for: A novel reduction approach to fabricate quantum-sized SnO2-conjugated reduced graphene oxide nanocomposites as non-enzymatic glucose sensors
Source: Royal Society of Chemistry journal article supplement (doi:10.1039/c4cp00554f), 2014-01-01
Supplement: c4cp00554f1.pdf [file c4cp00554f1.pdf]

## Supplementary Information

### **A novel reduction approach to fabricate quantum-sized SnO<sub>2</sub>- conjugated reduced graphene oxide nanocomposite as a non- enzymatic glucose sensor**

Yixing Ye,<sup>a</sup> Panpan Wang,<sup>a</sup> Enmei Dai,<sup>a</sup> Jun Liu,<sup>a</sup> Zhenfei Tian,<sup>a</sup> Changhao Liang,\*

<sup>a</sup> Guosheng Shao<sup>b</sup>

<sup>a</sup>Key Laboratory of Materials Physics and Anhui Key Laboratory of Nanomaterials  
and Nanotechnology, Institute of Solid State Physics, Hefei Institutes of Physical  
Science, Chinese Academy of Sciences, Hefei 230031, China

<sup>b</sup>Institute for Renewable Energy and Environmental Technologies, University of  
Bolton, Bolton BL3 5AB, UK.

\*Corresponding author. Tel.: +86 551 65591129; Fax: +86 551 65591434.

E-mail address: chliang@issp.ac.cn (C. H. Liang).

Figure S1 displayed the colour change of outcomes during the reaction process. With the ending of the reaction, the initial yellow colour-like suspension was changed to black. Figure S2 (a) exhibited the CV curves of  $\text{SnO}_2$ -rGO modified GCE in 0.1M NaOH with (black line) and without (red line) 10mM glucose at a scan rate of 50mV/s. With the adding of 10mM glucose, there is a significant response, which proved the feasibility of using  $\text{SnO}_2$ -rGO modified GCE in glucose detection. As a comparison, Figure S2 (b) showed i-t curves of aged  $\text{SnO}_x$  colloid and rGO, respectively, which have been done for as-prepared  $\text{SnO}_2$ -rGO modified GCE. We also can see the poor performance of aged  $\text{SnO}_x$  colloid and rGO at glucose detection experiment from the figure S2 (b). Figure S3 was the morphology and phase characterization of as-prepared other graphene composites in the same way ( $\text{ZnO}$ -rGO and  $\text{MgSnO}_3$ -rGO). Figure S3 (a) and (d) were the XRD patterns of  $\text{ZnO}$ -rGO and  $\text{MgSnO}_3$ -rGO, which proved the composition of the result products. Figure S3 (b) illustrate that  $\text{ZnO}$  loading on rGO showed a sheet morphology assembled with quantum-dots. And  $\text{MgSnO}_3$  exhibited a cube structure in Figure S3 (c). The detail information will be discussed in other works.

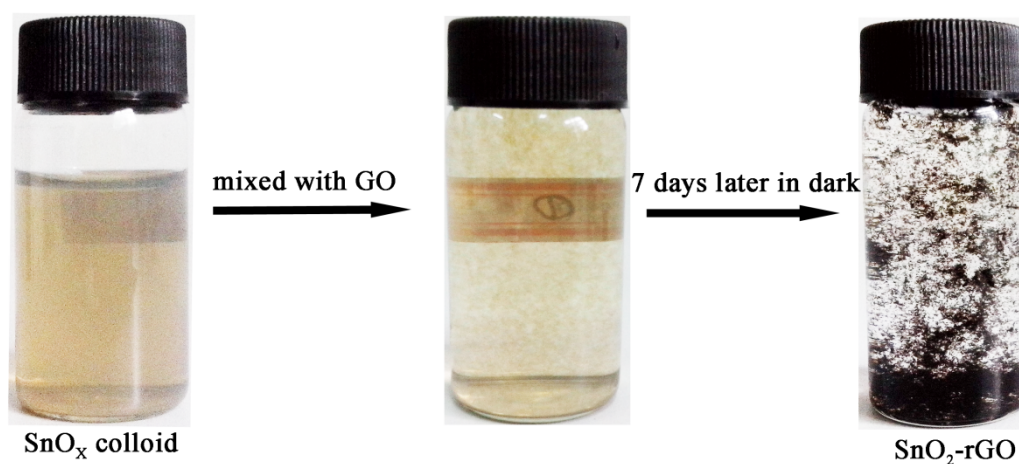

**Fig. S1** Digital images of colloidal product from  $\text{SnO}_x$  NPs to  $\text{SnO}_2$ -rGO nanocomposites.

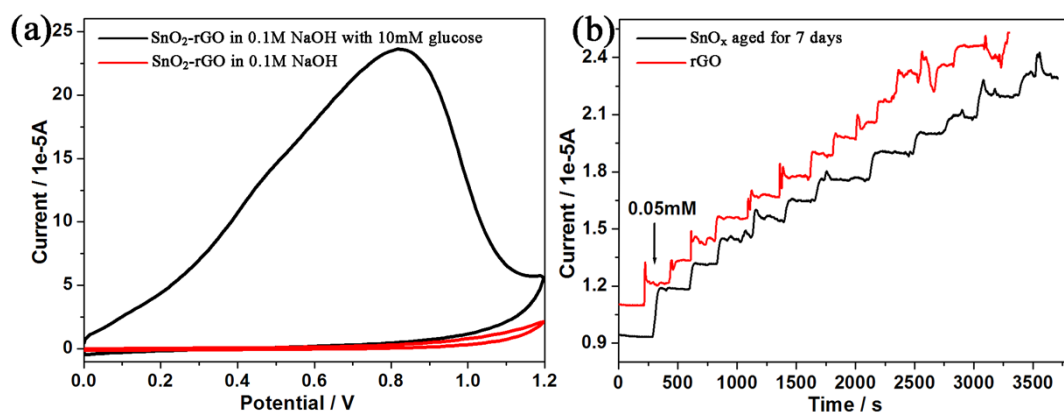

**Fig. S2** (a) is the CV curves of SnO<sub>2</sub>-rGO modified GCE in 0.1M NaOH with (black line) and without (red line) 10mM glucose at a scan rate of 50mV/s. (b) is the i-t curves carried out in 0.1M NaOH with the successive addition of 0.05mM glucose for the aged SnO<sub>x</sub> colloid and rGO alone, respectively.

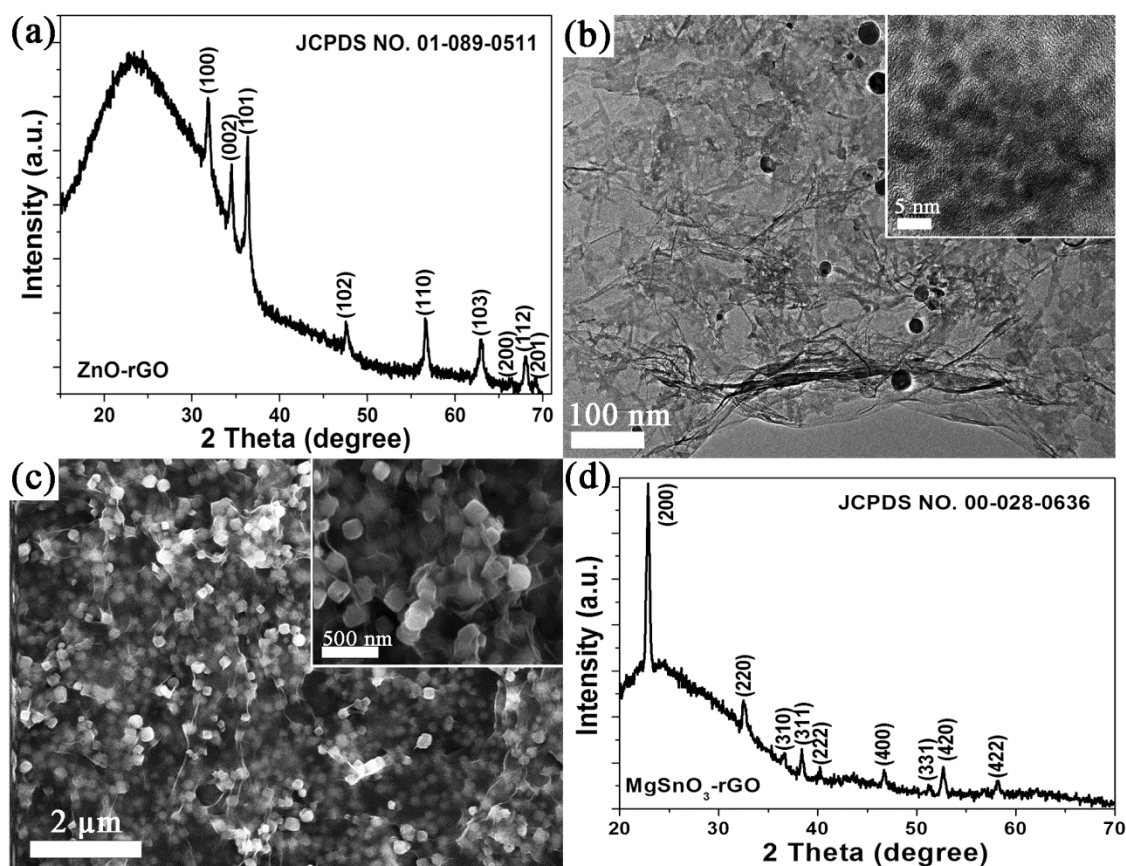

**Fig. S3** (a) and (d) are the XRD phase characterization of ZnO-rGO and MgSnO<sub>3</sub>-rGO. (b) and (c) are the morphology characterization of ZnO-rGO and MgSnO<sub>3</sub>-rGO.
